# Supplementary material for: L-Proline-Based Natural Deep Eutectic Solvents as Efficient Solvents and Catalysts for the Ultrasound-Assisted Synthesis of Aurones via Knoevenagel Condensation
Source: MDPI journal article supplement (doi:10.3390/catal12030249), 2022-02-22
Supplement: s1 [file s1]

## Supplementary Materials

# L-Proline-Based Natural Deep Eutectic Solvents as Efficient Solvents and Catalysts for the Ultrasound-Assisted Synthesis of Aurones via Knoevenagel Condensation

Maria-Anna Karadendrou, Ioanna Kostopoulou, Vasiliki Kakokefalou, Andromachi Tzani and Anastasia Detsi \*

Laboratory of Organic Chemistry, Department of Chemical Sciences, School of Chemical Engineering, National Technical University of Athens, Iroon Polytechniou 9, Zografou Campus, 15780 Athens, Greece;  
mariannakaradendrou@mail.ntua.gr (M.-A.K.);  
ioanna.th.kostopoulou@gmail.com (I.K.);  
vickyfer@hotmail.gr (V.K.); atzani@mail.ntua.gr (A.T.)

\* Correspondence: adetsi@chemeng.ntua.gr; Tel.: +30-2107724126

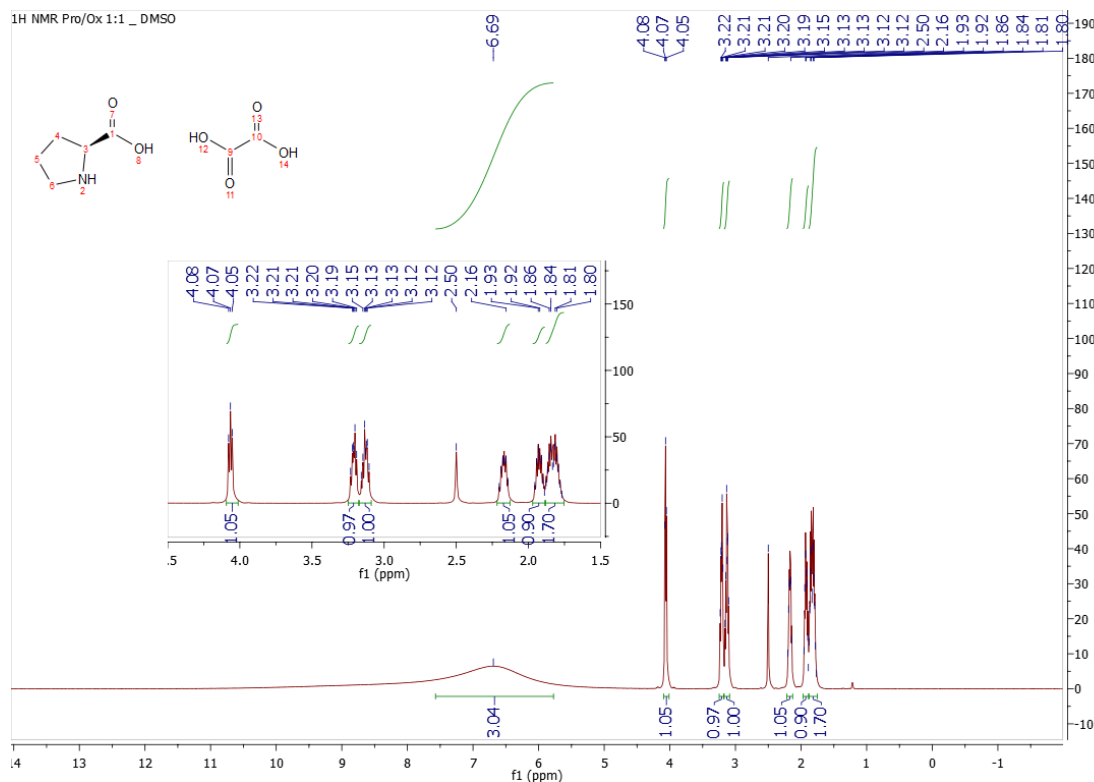

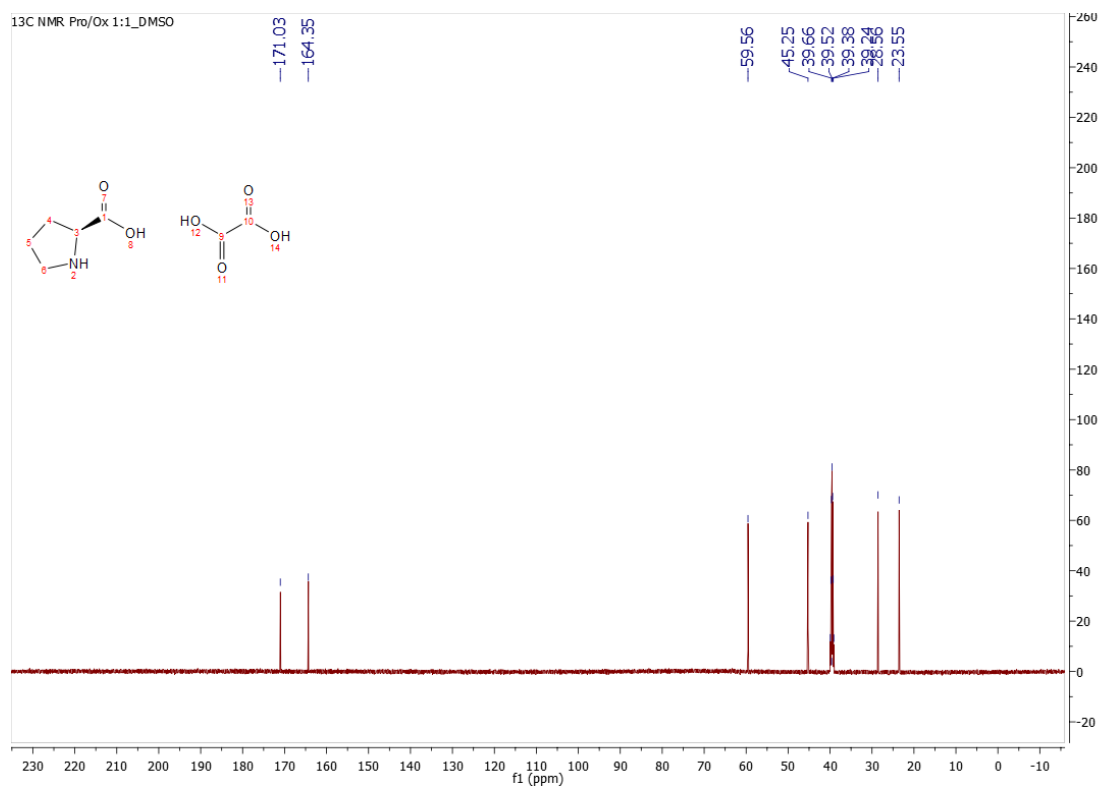

Figure S2. <sup>13</sup>C NMR of NaDES Pro/Ox 1:1

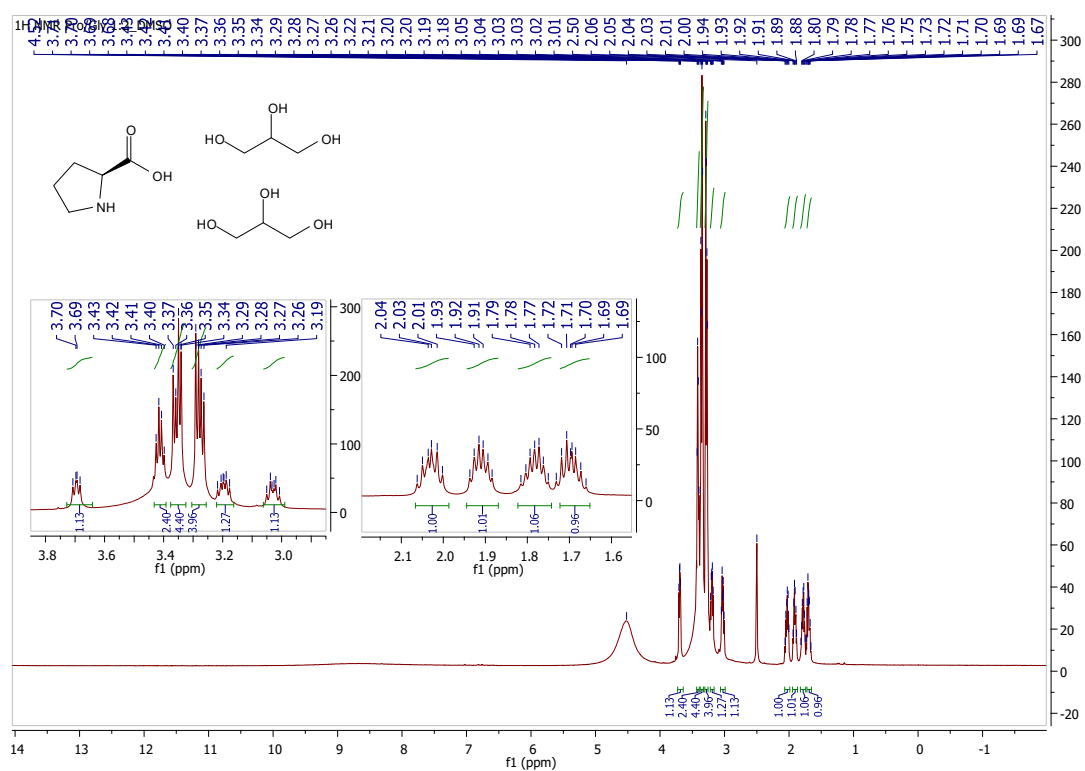

Figure S3. <sup>1</sup>H NMR of NaDES Pro/Gly 1:2

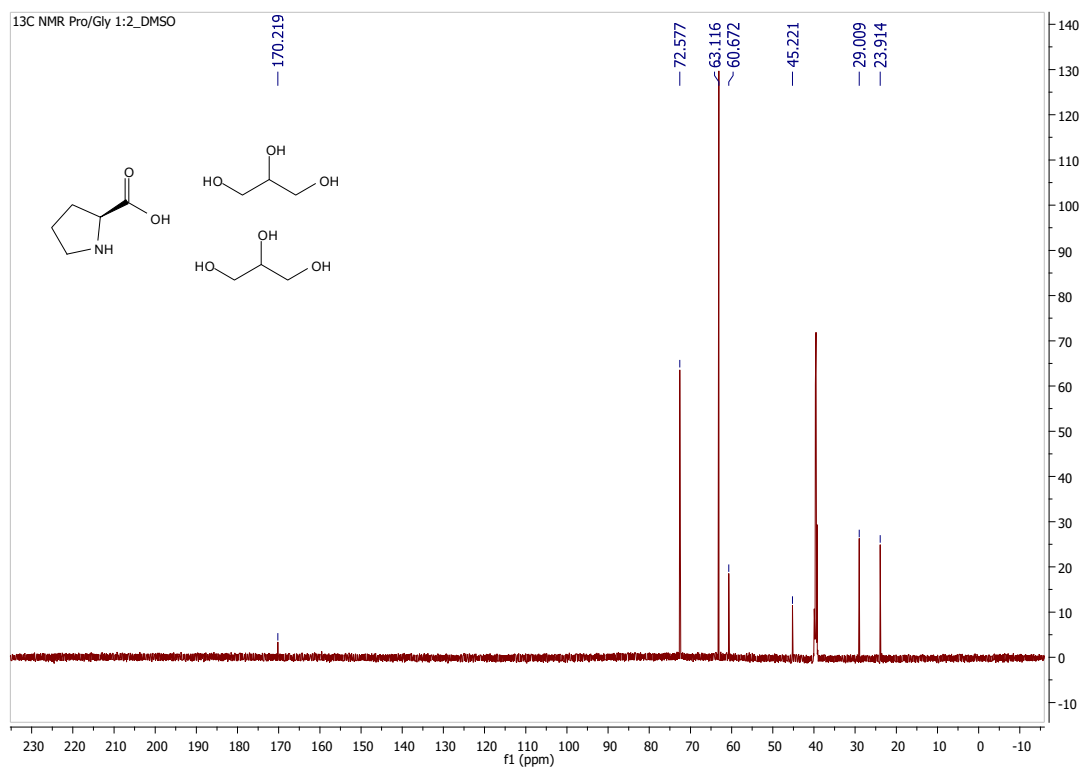

Figure S4. <sup>13</sup>C NMR of NaDES Pro/Gly 1:2

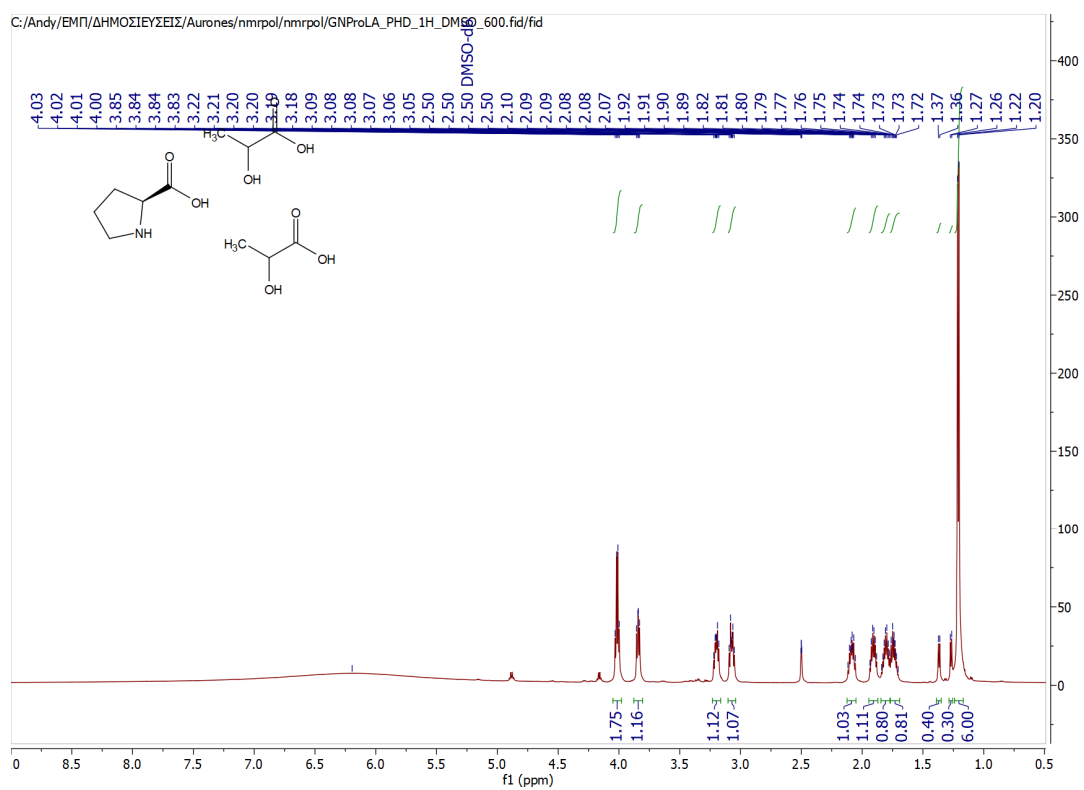

Figure S5. <sup>1</sup>H NMR of NaDES Pro/LA/W 1:2:2.5

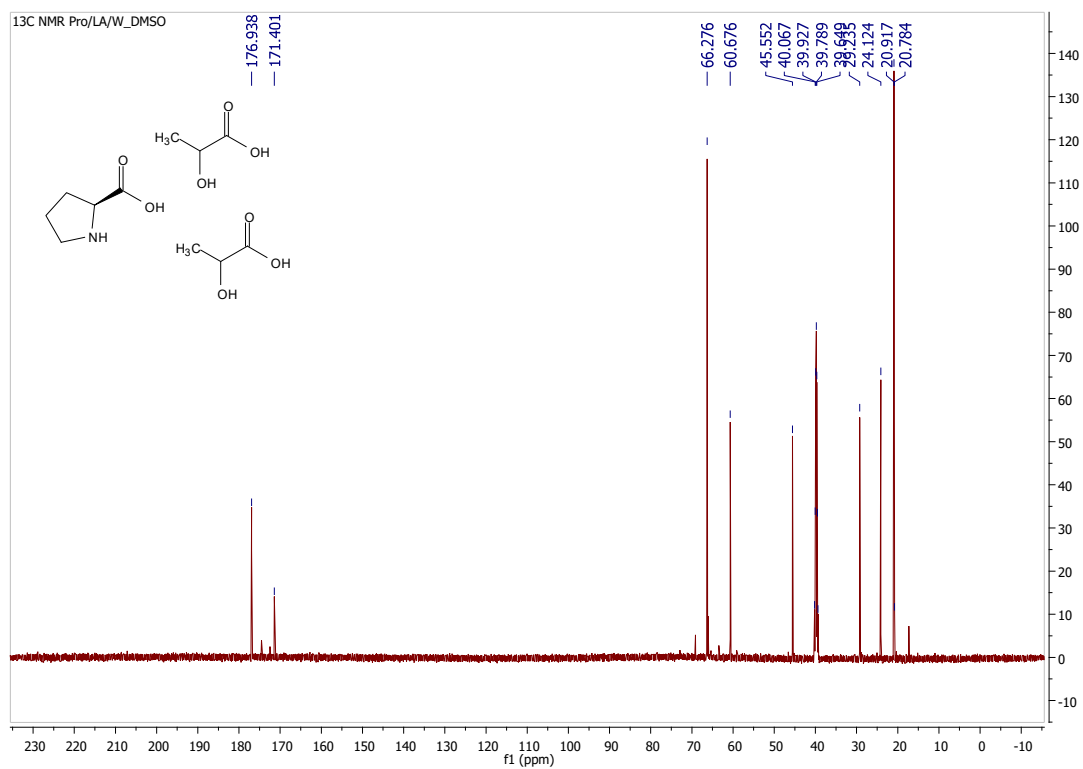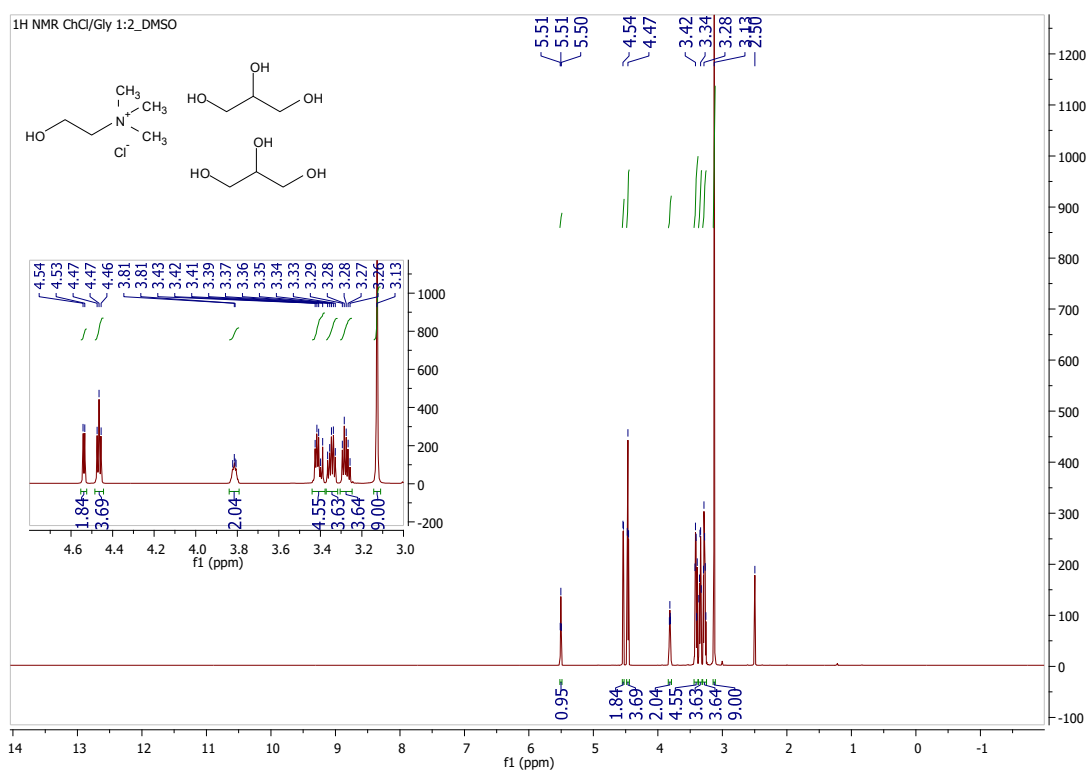

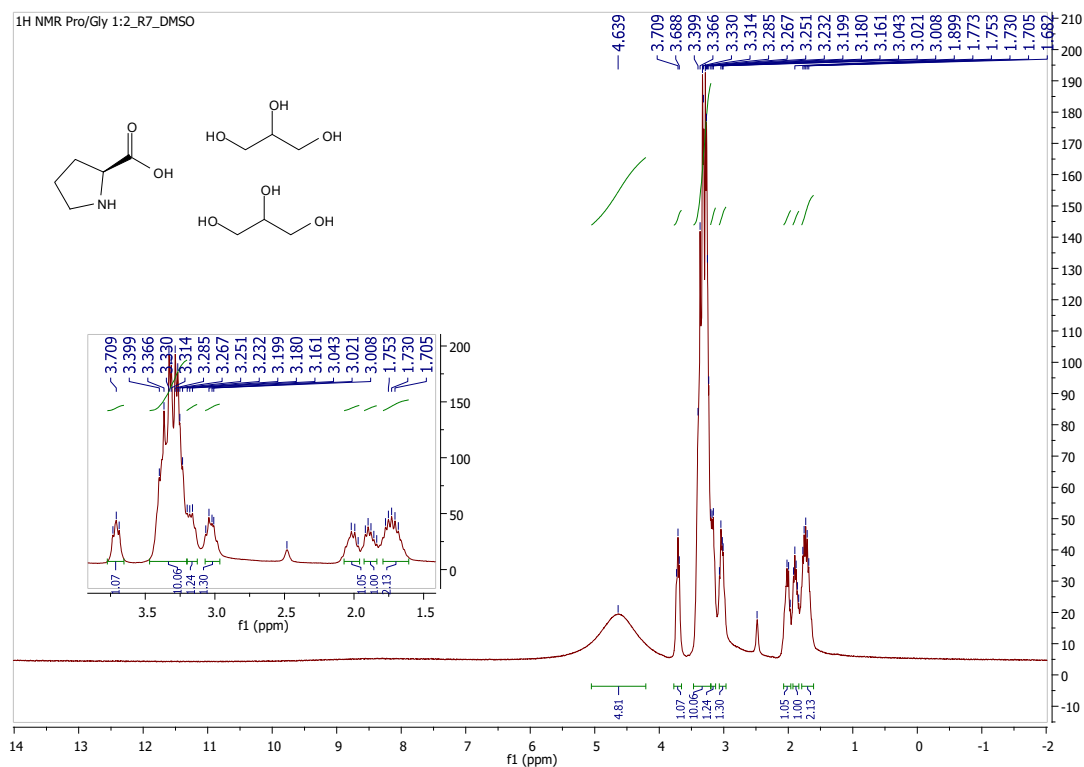

Figure S8. <sup>1</sup>H NMR of recycled NaDES Pro/Gly 1:2 after run 7

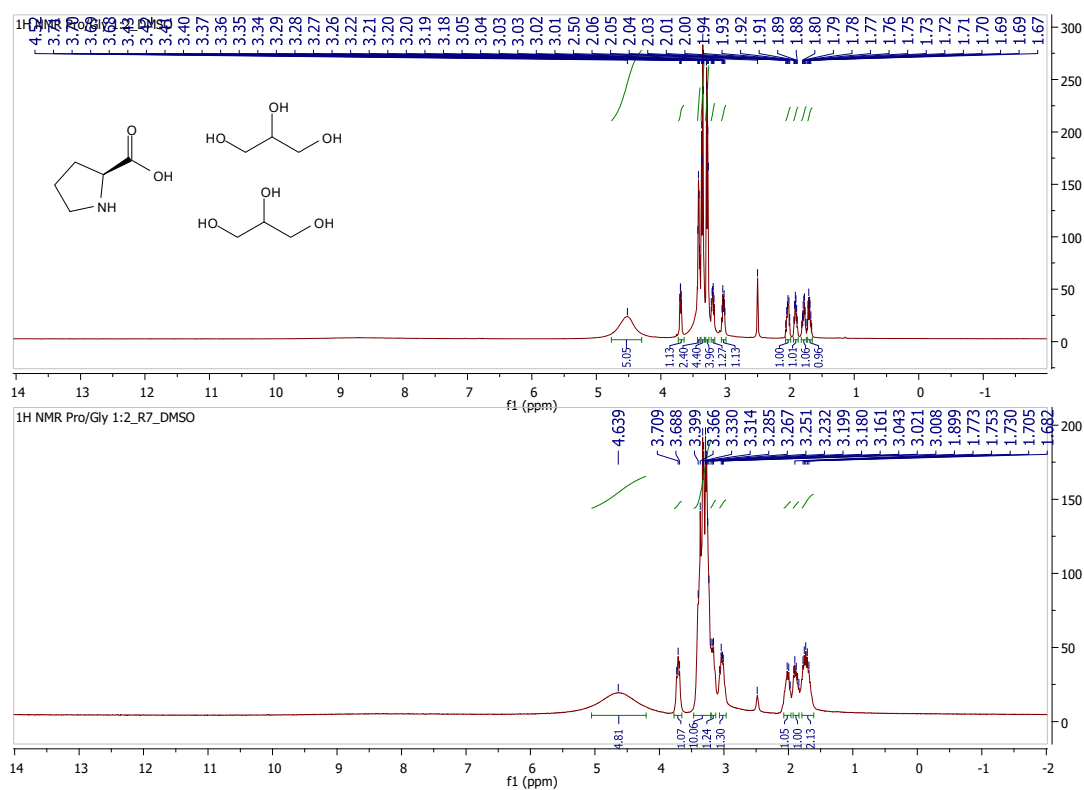

Figure S9. <sup>1</sup>H NMR of NaDES Pro/Gly before use and after seven runs

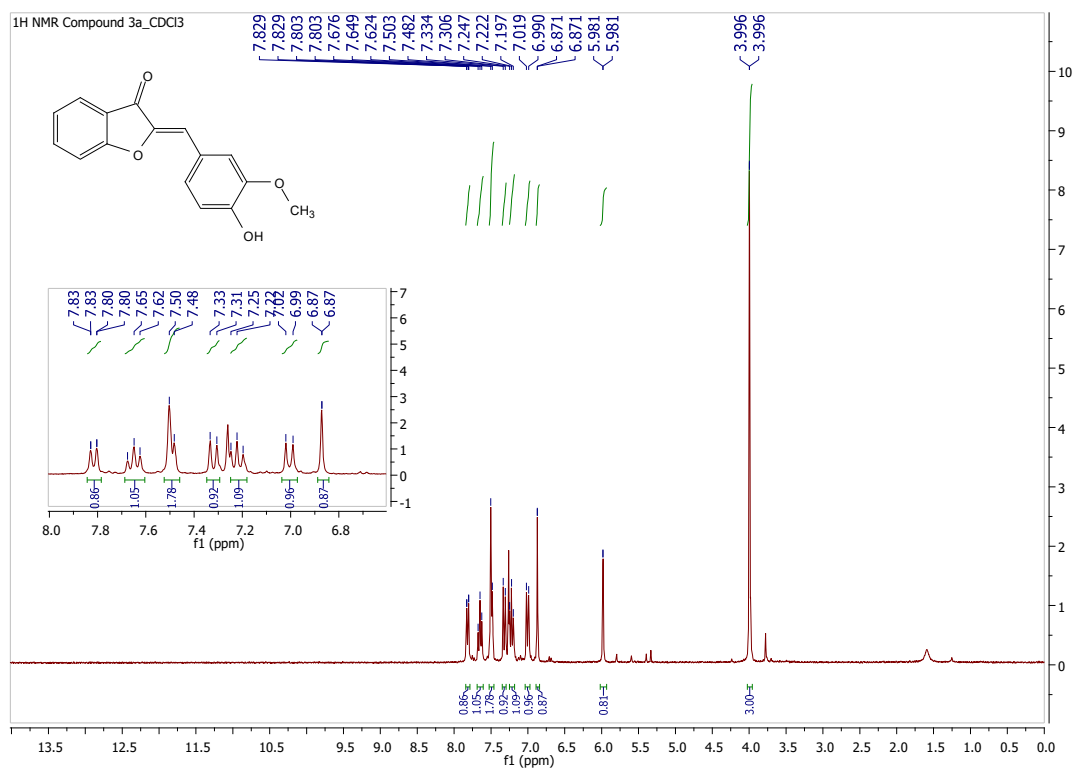

Figure S10. <sup>1</sup>H NMR of compound 3a

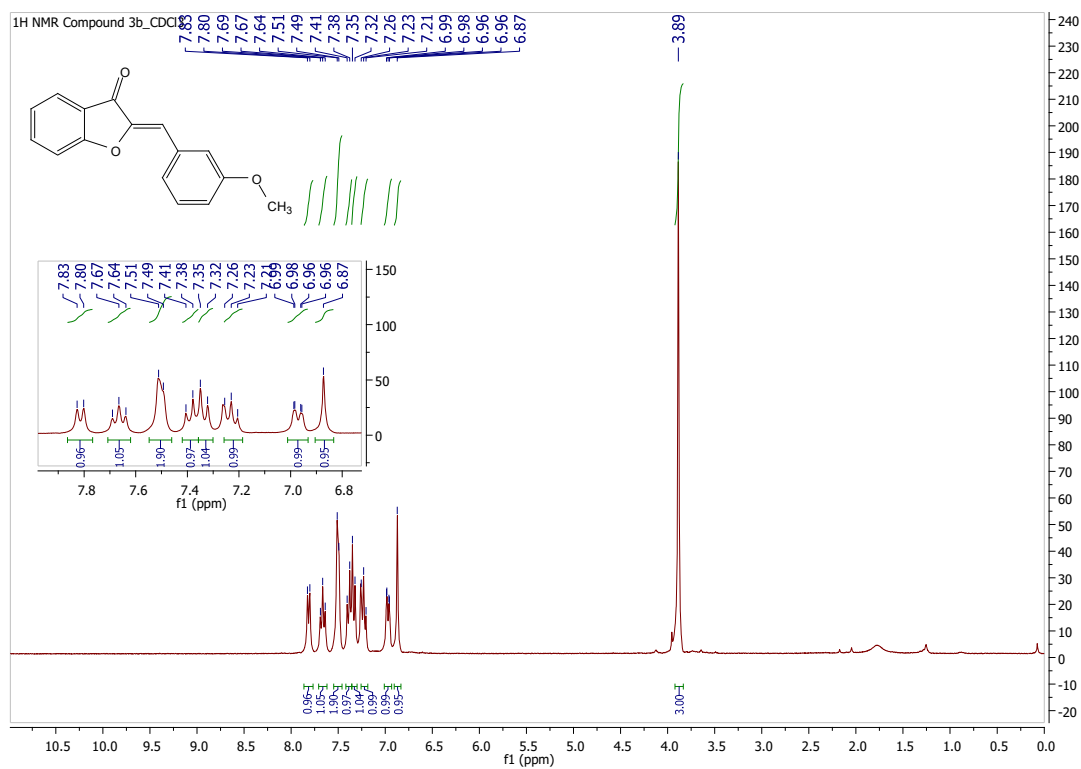

Figure S11. <sup>1</sup>H NMR of compound 3b

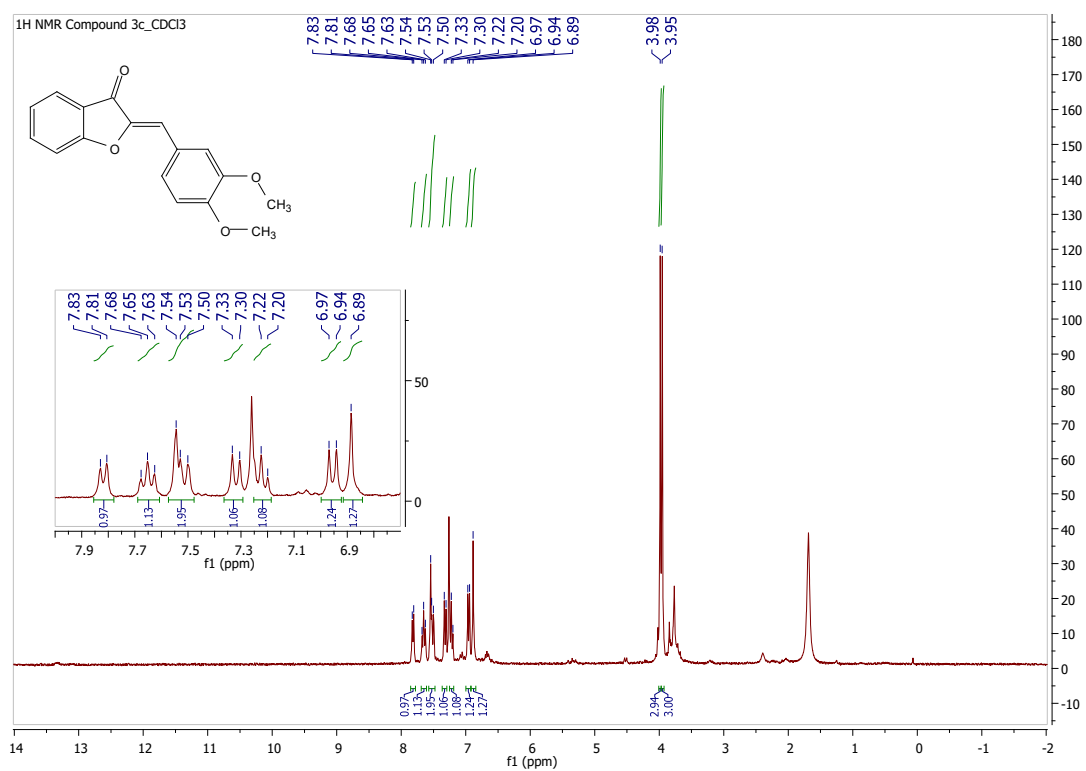

Figure S12. <sup>1</sup>H NMR of compound 3c

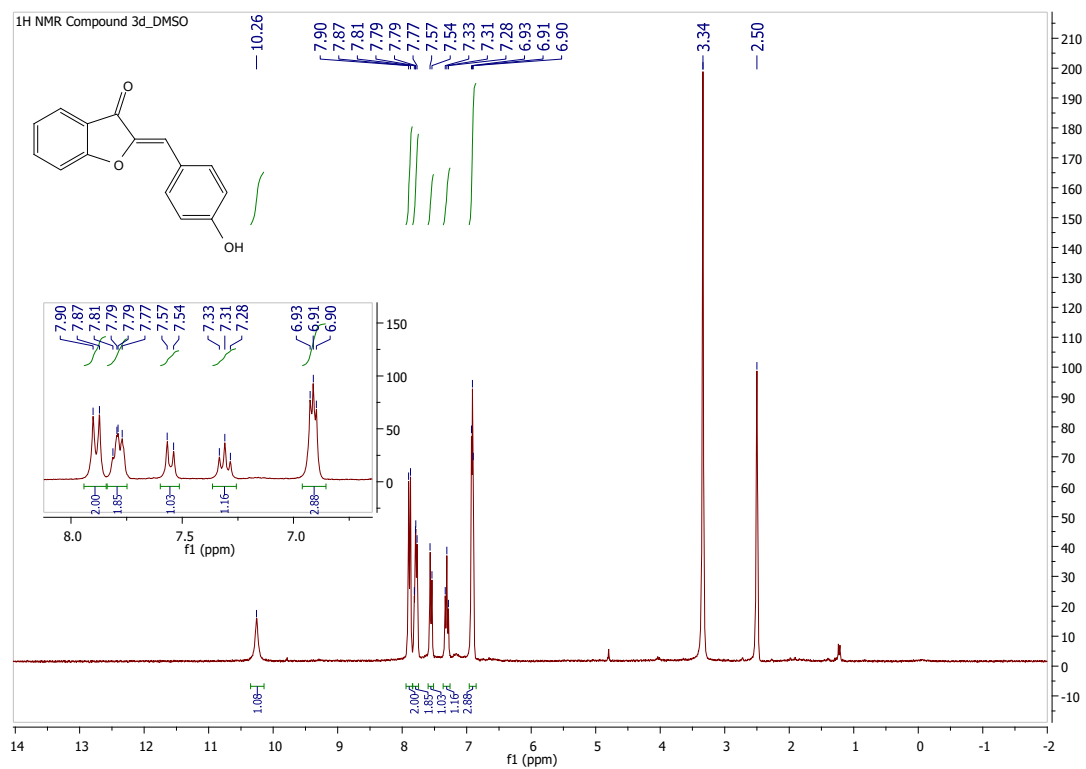

Figure S13. <sup>1</sup>H NMR of compound 3d

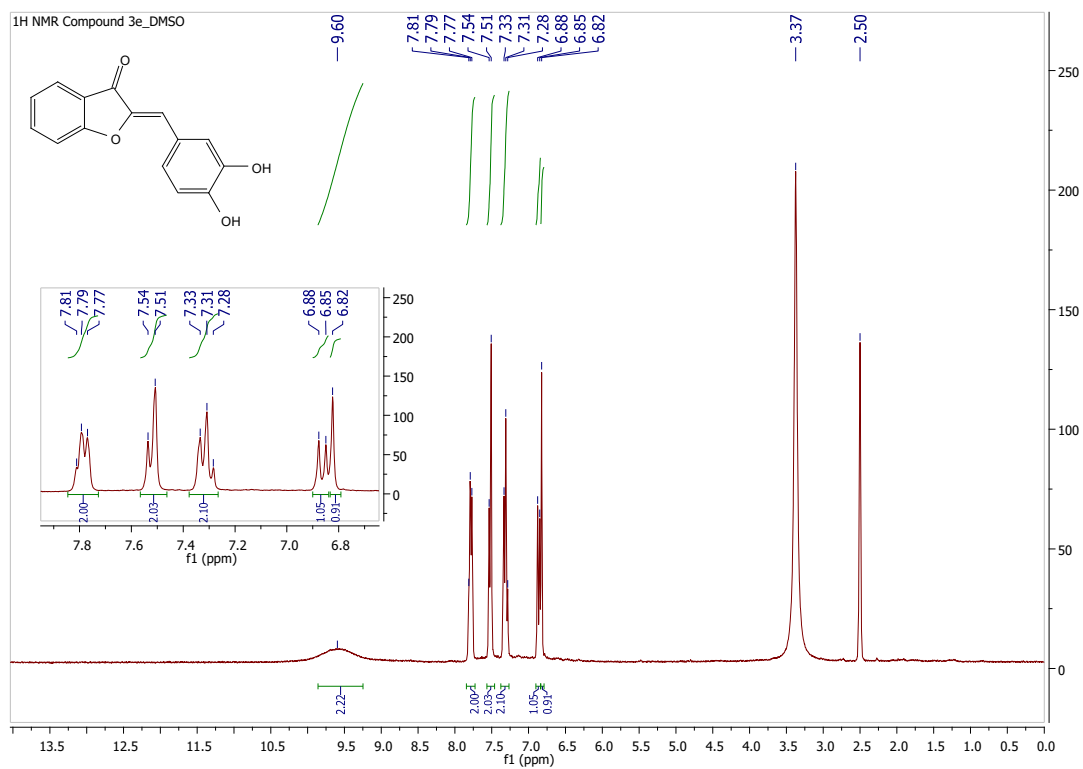

Figure S14. <sup>1</sup>H NMR of compound 3e

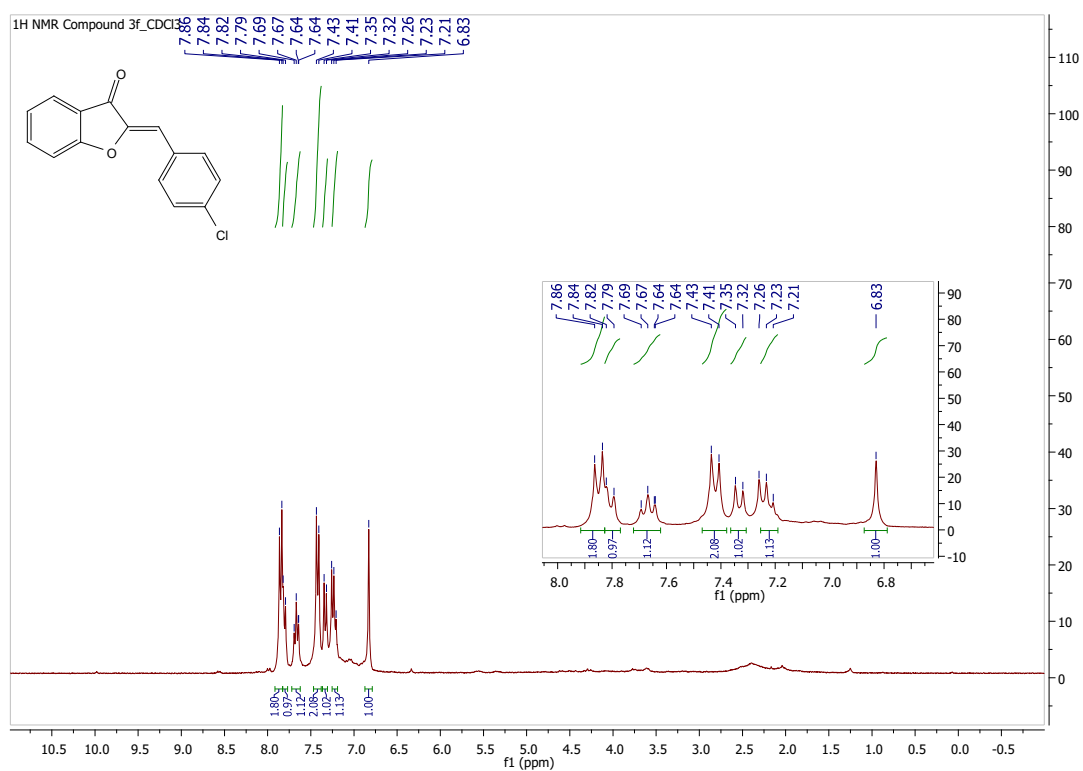

Figure S15. <sup>1</sup>H NMR of compound 3f

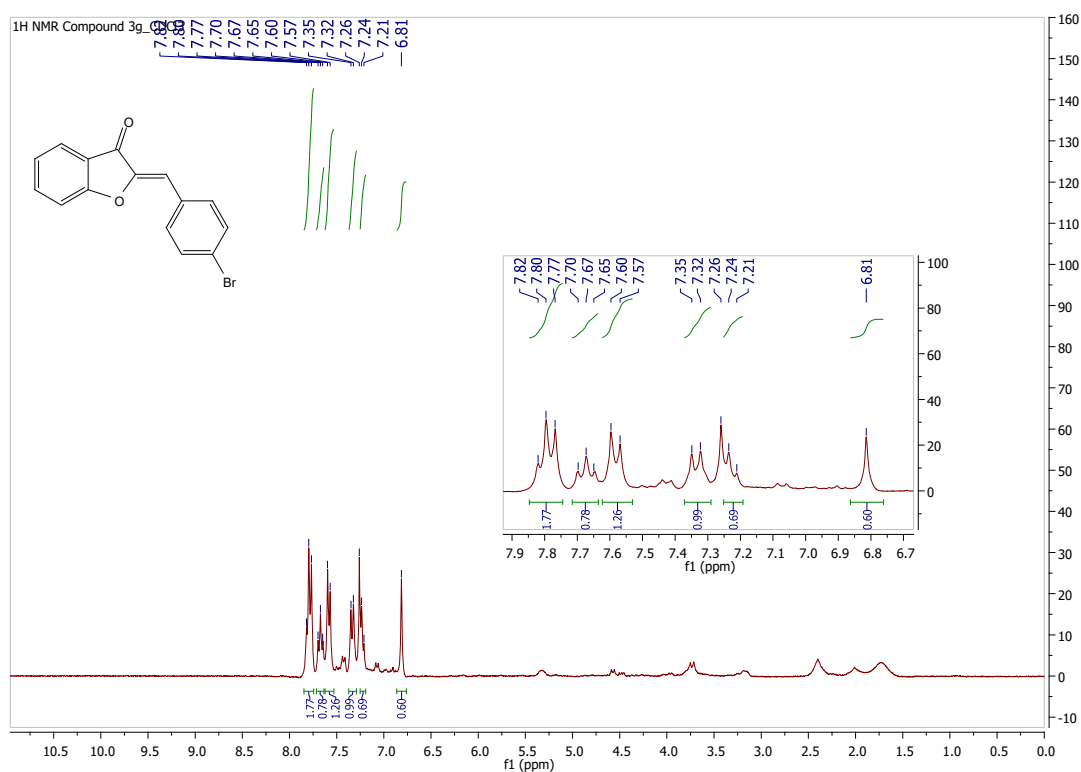

Figure S16. <sup>1</sup>H NMR of compound 3g

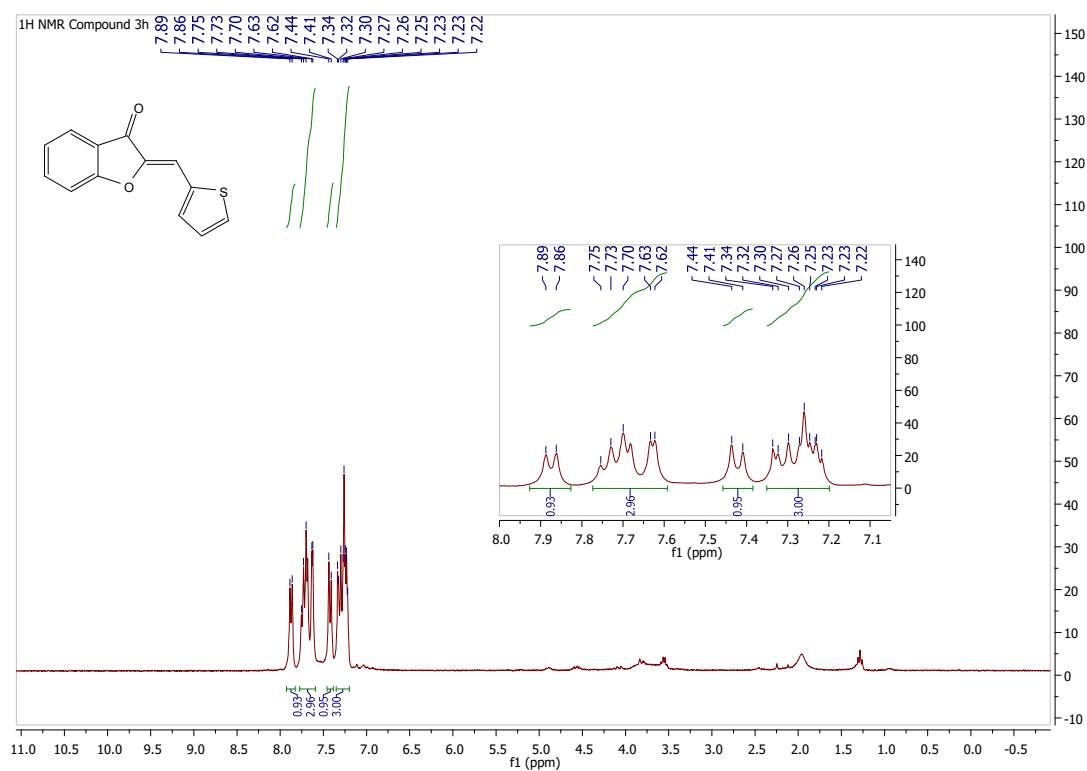

Figure S17. <sup>1</sup>H NMR of compound 3h

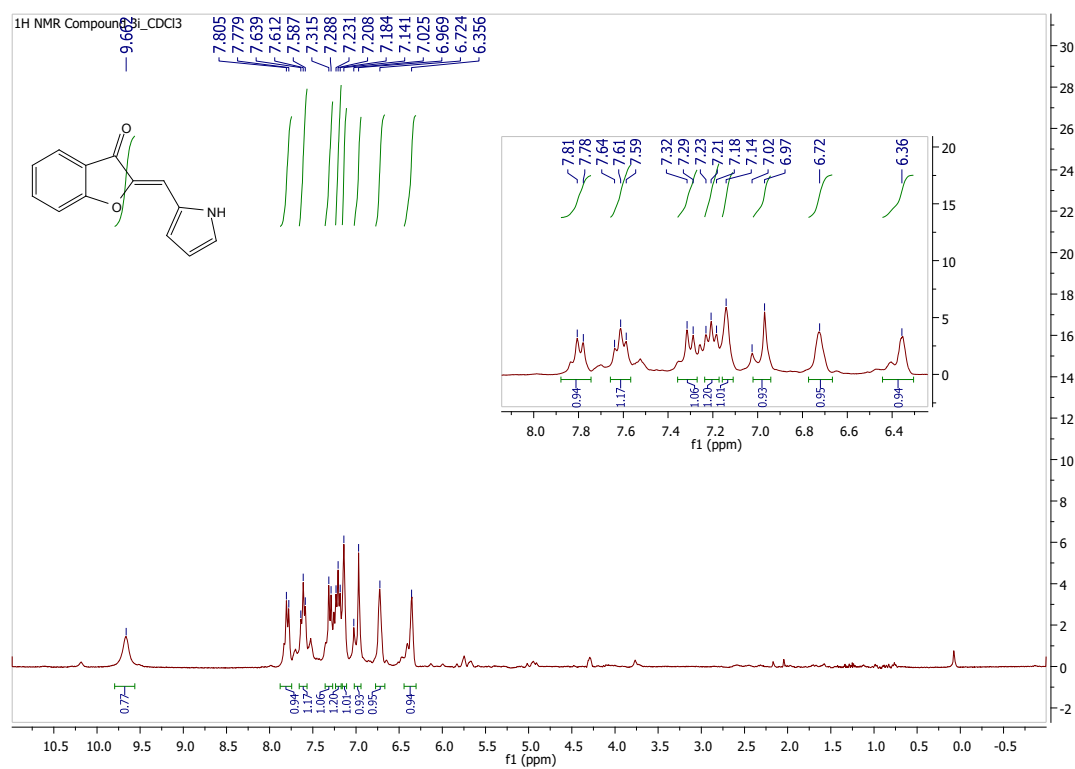

Figure S18. <sup>1</sup>H NMR of compound **3i**
